# Supplementary material
Source: PubMed Central journal article supplement (PMC6325722)
Supplement: ic8b01740_si_001.pdf [file ic8b01740_si_001.pdf]

## Electronic Supplementary Information

# The direct single- and double-side triol-functionalization of the mixed type Anderson polyoxotungstate $[\text{Cr}(\text{OH})_3\text{W}_6\text{O}_{21}]^{6-}$

Nadiia I. Gumerova,<sup>†</sup> Tania Caldera Fraile,<sup>†</sup> Alexander Roller,<sup>‡</sup> Gerald Giester<sup>§</sup>, Magda Pascual-Borràs,<sup>¶</sup> C. André Ohlin<sup>¶</sup> and Annette Rompel<sup>\*†</sup>

<sup>†</sup> Universität Wien, Fakultät für Chemie, Institut für Biophysikalische Chemie, Wien, Austria. [www.bpc.univie.ac.at](http://www.bpc.univie.ac.at)

<sup>‡</sup> Universität Wien, Fakultät für Chemie, Zentrum für Röntgenstrukturanalyse, Wien, Austria

<sup>§</sup> Universität Wien, Fakultät für Geowissenschaften, Geographie und Astronomie, Institut für Mineralogie und Kristallographie, Wien, Austria

<sup>¶</sup> Department of Chemistry, Umeå University, Umeå, Sweden. <http://www.moleculargeo.chem.umu.se>

\* Email: [annette.rompel@univie.ac.at](mailto:annette.rompel@univie.ac.at)

## 1. IR spectroscopy

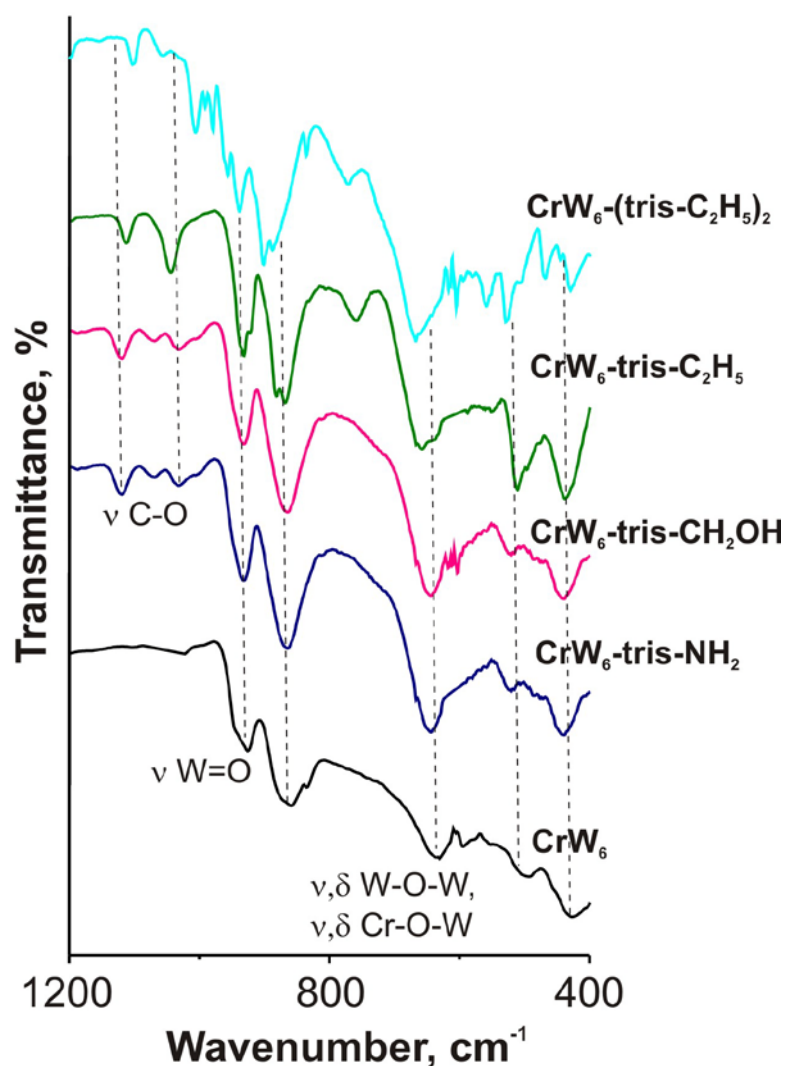

**Figure S1.** IR spectra of compounds  $\text{Na}_3\text{CrW}_6\text{-(tris-C}_2\text{H}_5)_2\cdot 13\text{H}_2\text{O}$ ,  $\text{Na}_3\text{K}_3\text{CrW}_6\text{-tris-C}_2\text{H}_5\cdot 17\text{H}_2\text{O}$ ,  $\text{Na}_5\text{CrW}_6\text{-tris-NH}_3\cdot 17\text{H}_2\text{O}$ ,  $\text{Na}_4(\text{TMA})_2\text{CrW}_6\text{-tris-CH}_2\text{OH}\cdot 19\text{H}_2\text{O}$  and  $\text{Na}_6[\text{Cr}(\text{OH})_3\text{W}_6\text{O}_{21}]\cdot 22\text{H}_2\text{O}$ .

**Table S1.** The assignment of IR bands recorded from  $\text{Na}_3\text{CrW}_6\text{-(tris-C}_2\text{H}_5)_2\cdot 13\text{H}_2\text{O}$  (=  $\text{CrW}_6\text{-(tris-C}_2\text{H}_5)_2$ ),  $\text{Na}_3\text{K}_3\text{CrW}_6\text{-tris-C}_2\text{H}_5\cdot 17\text{H}_2\text{O}$  (=  $\text{CrW}_6\text{-tris-C}_2\text{H}_5$ ),  $\text{Na}_5\text{CrW}_6\text{-tris-NH}_3\cdot 17\text{H}_2\text{O}$  (=  $\text{CrW}_6\text{-tris-NH}_2$ ),  $\text{Na}_4(\text{TMA})_2\text{CrW}_6\text{-tris-CH}_2\text{OH}\cdot 19\text{H}_2\text{O}$  (=  $\text{CrW}_6\text{-tris-CH}_2\text{OH}$ ) and  $\text{Na}_6[\text{Cr}(\text{OH})_3\text{W}_6\text{O}_{21}]\cdot 22\text{H}_2\text{O}$  (=  $\text{CrW}_6$ ).

|                             | The bands ( $\text{cm}^{-1}$ ) in IR spectra of |                                          |                                 |                                          |                |
|-----------------------------|-------------------------------------------------|------------------------------------------|---------------------------------|------------------------------------------|----------------|
|                             | $\text{CrW}_6\text{-(tris-C}_2\text{H}_5)_2$    | $\text{CrW}_6\text{-tris-C}_2\text{H}_5$ | $\text{CrW}_6\text{-tris-NH}_2$ | $\text{CrW}_6\text{-tris-CH}_2\text{OH}$ | $\text{CrW}_6$ |
| $\delta \text{ Cr-O-W}$     | 428                                             | 435                                      | 439                             | 438                                      | 430            |
| $\nu, \delta \text{ W-O-W}$ | 527                                             | 513                                      | 521                             | 522                                      | 520            |
|                             | 668                                             | 659                                      | 644                             | 646                                      | 640            |
|                             | 835                                             | 869                                      | 865                             | 862                                      | 863            |
| $\nu \text{ W=O}$           | 936                                             | 933                                      | 933                             | 932                                      | 932            |
| $\nu \text{ C-O}$           | 1007                                            | 1045                                     | 1032                            | 1031                                     | -              |
|                             | 1058                                            |                                          | 1072                            | 1067                                     | -              |
|                             | 1110                                            | 1113                                     | 1120                            | 1118                                     | -              |

## 2. Thermogravimetric analysis

**Table S2.** TGA data for compounds  $\text{Na}_3\text{CrW}_6\text{-(tris-C}_2\text{H}_5)_2\cdot 13\text{H}_2\text{O}$ ,  $\text{Na}_2\text{K}_4\text{CrW}_6\text{-tris-C}_2\text{H}_5\cdot 17\text{H}_2\text{O}$ ,  $\text{Na}_5\text{CrW}_6\text{-tris-NH}_3\cdot 17\text{H}_2\text{O}$  and  $\text{Na}_4(\text{TMA})_2\text{CrW}_6\text{-tris-CH}_2\text{OH}\cdot 19\text{H}_2\text{O}$  (See Fig. S2 – S5).

| Compound                                                                                    | Step | T, °C   | Mass-loss, % | Number of water and Tris-R molecules corresponding to mass-loss  |
|---------------------------------------------------------------------------------------------|------|---------|--------------|------------------------------------------------------------------|
| $\text{Na}_3\text{CrW}_6\text{-(tris-C}_2\text{H}_5)_2\cdot 13\text{H}_2\text{O}$           | I    | 25-200  | 4.46         | 5 H <sub>2</sub> O                                               |
|                                                                                             | II   | 200-320 | 4.01         | 4.5 H <sub>2</sub> O                                             |
|                                                                                             | III  | 320-375 | 2.16         | 2.5 H <sub>2</sub> O                                             |
|                                                                                             | IV   | 375-700 | 7.70         | 2 (CH <sub>2</sub> ) <sub>3</sub> CC <sub>2</sub> H <sub>5</sub> |
| $\text{Na}_5\text{CrW}_6\text{-tris-NH}_3\cdot 17\text{H}_2\text{O}$                        | I    | 25-150  | 10.25        | 11.5 H <sub>2</sub> O                                            |
|                                                                                             | II   | 150-300 | 1.15         | 1.5 H <sub>2</sub> O                                             |
|                                                                                             | III  | 300-425 | 2.45         | 3 H <sub>2</sub> O                                               |
|                                                                                             | IV   | 425-480 | 0.74         | 1 H <sub>2</sub> O                                               |
|                                                                                             | V    | 480-600 | 0.85         | 1 (CH <sub>2</sub> ) <sub>3</sub> CNH <sub>2</sub>               |
| $\text{Na}_4(\text{TMA})_2\text{CrW}_6\text{-tris-CH}_2\text{OH}\cdot 19\text{H}_2\text{O}$ | I    | 25-195  | 13.38        | 16 H <sub>2</sub> O                                              |
|                                                                                             | II   | 195-400 | 11.81        | 3 H <sub>2</sub> O + 2 TMA                                       |
|                                                                                             | III  | 400-600 | 3.20         | 1 (CH <sub>2</sub> ) <sub>3</sub> CCH <sub>2</sub> OH            |
| $\text{Na}_3\text{K}_3\text{CrW}_6\text{-tris-C}_2\text{H}_5\cdot 17\text{H}_2\text{O}$     | I    | 25-92   | 5.57         | 6.5 H <sub>2</sub> O                                             |
|                                                                                             | II   | 92-200  | 4.63         | 5.5 H <sub>2</sub> O                                             |
|                                                                                             | III  | 200-375 | 4.48         | 5 H <sub>2</sub> O                                               |
|                                                                                             | IV   | 375-600 | 3.81         | 1 (CH <sub>2</sub> ) <sub>3</sub> CC <sub>2</sub> H <sub>5</sub> |

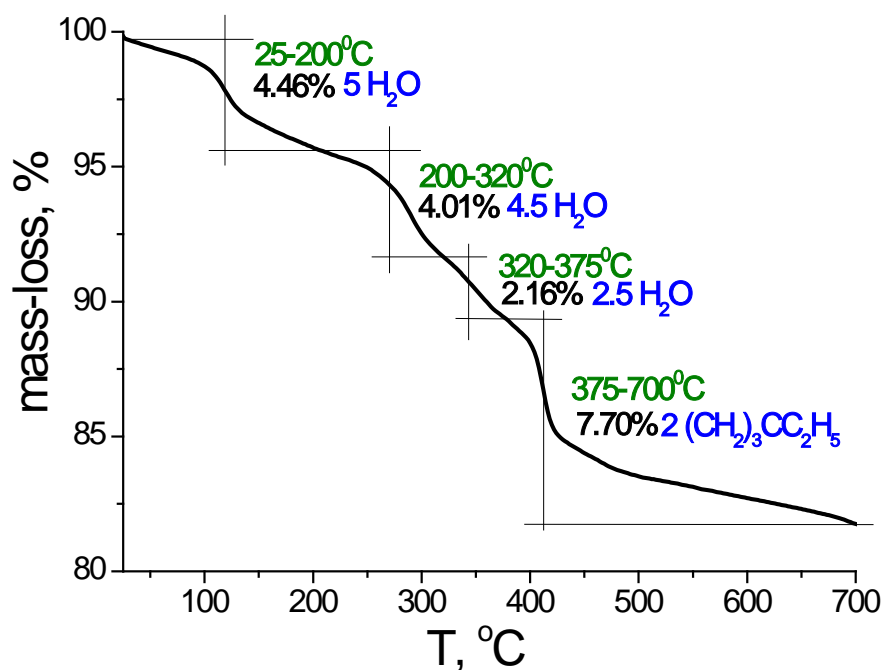

**Figure S2.** Thermogravimetric curve of  $\text{Na}_3\text{CrW}_6\text{-(tris-C}_2\text{H}_5)_2\cdot 13\text{H}_2\text{O}$ .

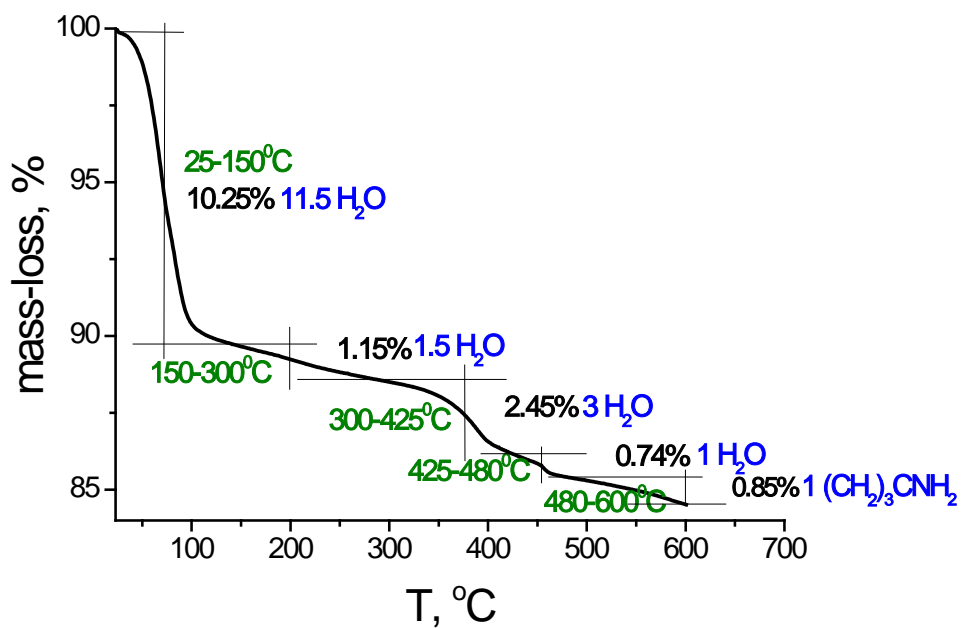

**Figure S3.** Thermogravimetric curve of  $\text{Na}_5\text{CrW}_6\text{-tris-NH}_3\cdot 17\text{H}_2\text{O}$ .

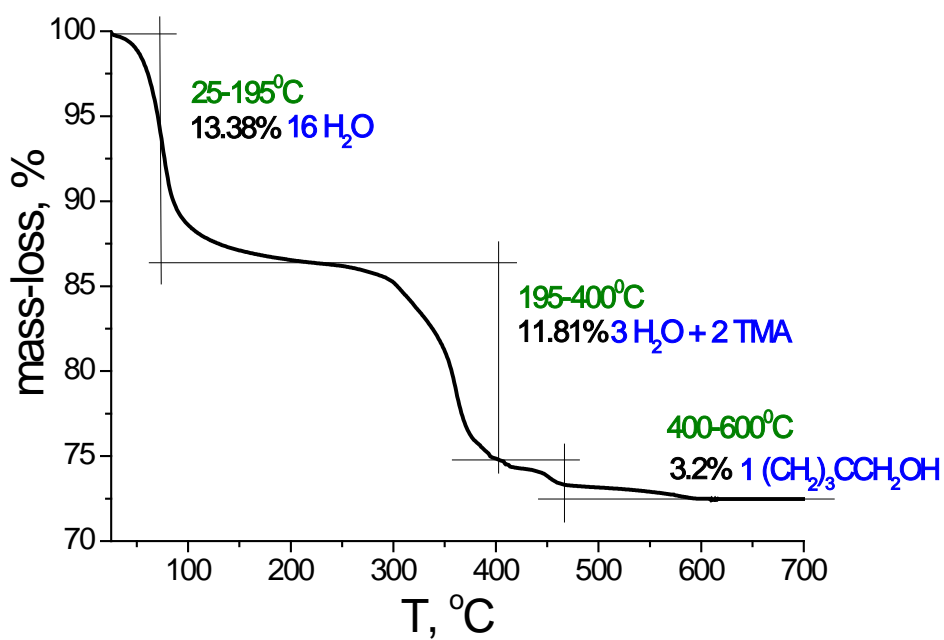

**Figure S4.** Thermogravimetric curve of  $\text{Na}_4(\text{TMA})_2\text{CrW}_6\text{-tris-CH}_2\text{OH}\cdot 19\text{H}_2\text{O}$ .

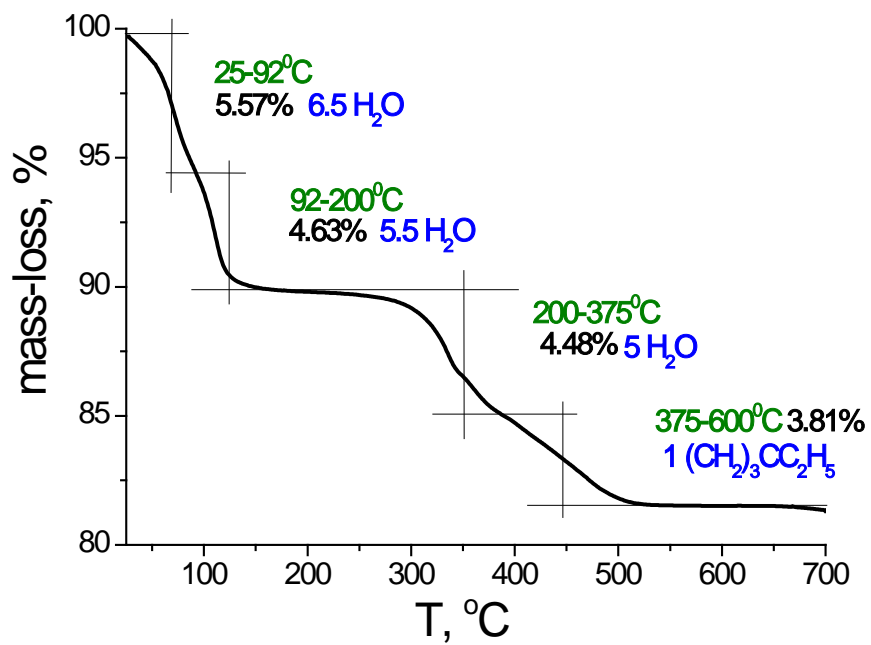

**Figure S5.** Thermogravimetric curve of  $\text{Na}_3\text{K}_3\text{CrW}_6\text{-tris-C}_2\text{H}_5\cdot 17\text{H}_2\text{O}$ .

### 3. ESI-MS

All compounds were investigated with an ES+Qq-oaRTOF supplied by Bruker Daltonics Ltd. Bruker Daltonics Data Analysis software was used to analyze the results. The measurement was carried out in a 1:1 mixture of water/MeCN, collected in negative ion mode and with the spectrometer calibrated with the standard tune-mix to give an accuracy of *ca.* 5 ppm in the region of *m/z* 300–3000.

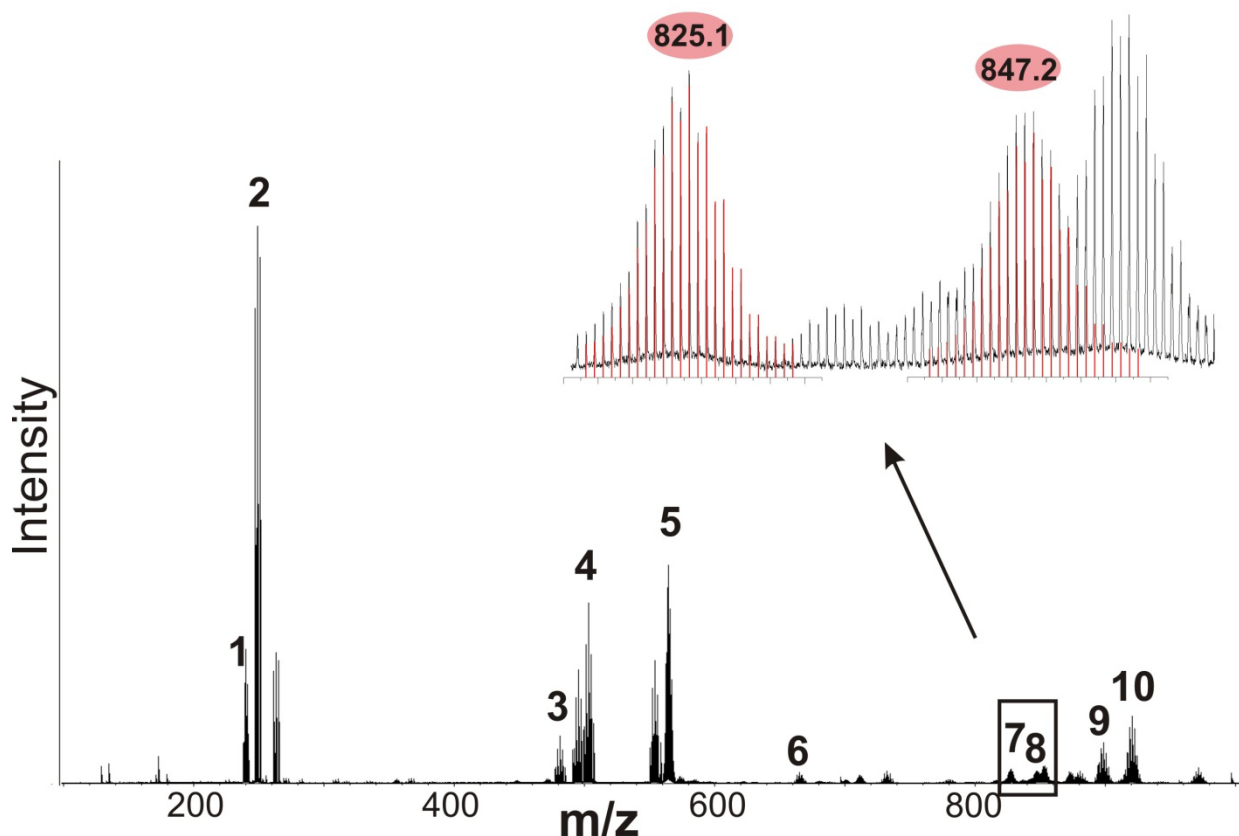

**Figure S6.** Negative ion-mode ESI-MS spectrum of  $\text{Na}_4(\text{TMA})_2\text{CrW}_6\text{-tris-CH}_2\text{OH}$  in  $\text{H}_2\text{O}/\text{CH}_3\text{CN}$ . ESI-MS peak envelopes of  $\text{Na}_x\text{H}_{4-x}[\text{CrW}_6\text{O}_{21}(\text{OCH}_2)_3\text{CCH}_2\text{OH}]^{2-}$  ( $x = 1, 3$ ; experimental pattern, black; simulated pattern, red).

**Table S3.** Species assigned to the peaks in the ESI-MS spectrum of  $\text{Na}_4(\text{TMA})_2\text{CrW}_6\text{-tris-CH}_2\text{OH}$  (see Fig. S6).

|    | <i>m/z</i>   | <i>m/z</i> (calc.) | Peak Assignment                                                                                              |
|----|--------------|--------------------|--------------------------------------------------------------------------------------------------------------|
| 1  | 239.9        | 239.9              | $[\text{W}_2\text{O}_7]^{2-}$                                                                                |
| 2  | 248.9        | 248.9              | $\text{H}[\text{WO}_4]^-$                                                                                    |
| 3  | 480.9        | 480.9              | $\text{H}[\text{W}_2\text{O}_7]^-$                                                                           |
| 4  | 502.8        | 502.7              | $\text{Na}[\text{W}_2\text{O}_7]^-$                                                                          |
| 5  | 564.4        | 564.4              | $[\text{CrW}_4\text{O}_{13}(\text{OCH}_2)_3\text{CCH}_2\text{OH}]^{2-}$                                      |
| 6  | 680.2        | 680.2              | $[\text{CrW}_5\text{O}_{16}(\text{OCH}_2)_3\text{CCH}_2\text{OH}]^{2-}$                                      |
| 7  | <b>825.1</b> | <b>825.1</b>       | <b><math>\text{NaH}_3[\text{CrW}_6\text{O}_{21}(\text{OCH}_2)_3\text{CCH}_2\text{OH}]^{2-}</math></b>        |
| 8  | <b>847.2</b> | <b>847.1</b>       | <b><math>\text{Na}_3\text{H}[\text{CrW}_6\text{O}_{21}(\text{OCH}_2)_3\text{CCH}_2\text{OH}]^{2-}</math></b> |
| 9  | 897.8        | 897.8              | $\text{H}[\text{CrW}_3\text{O}_{10}(\text{OCH}_2)_3\text{CCH}_2\text{OH}]^-$                                 |
| 10 | 919.8        | 919.6              | $\text{Na}[\text{CrW}_3\text{O}_{10}(\text{OCH}_2)_3\text{CCH}_2\text{OH}]^-$                                |

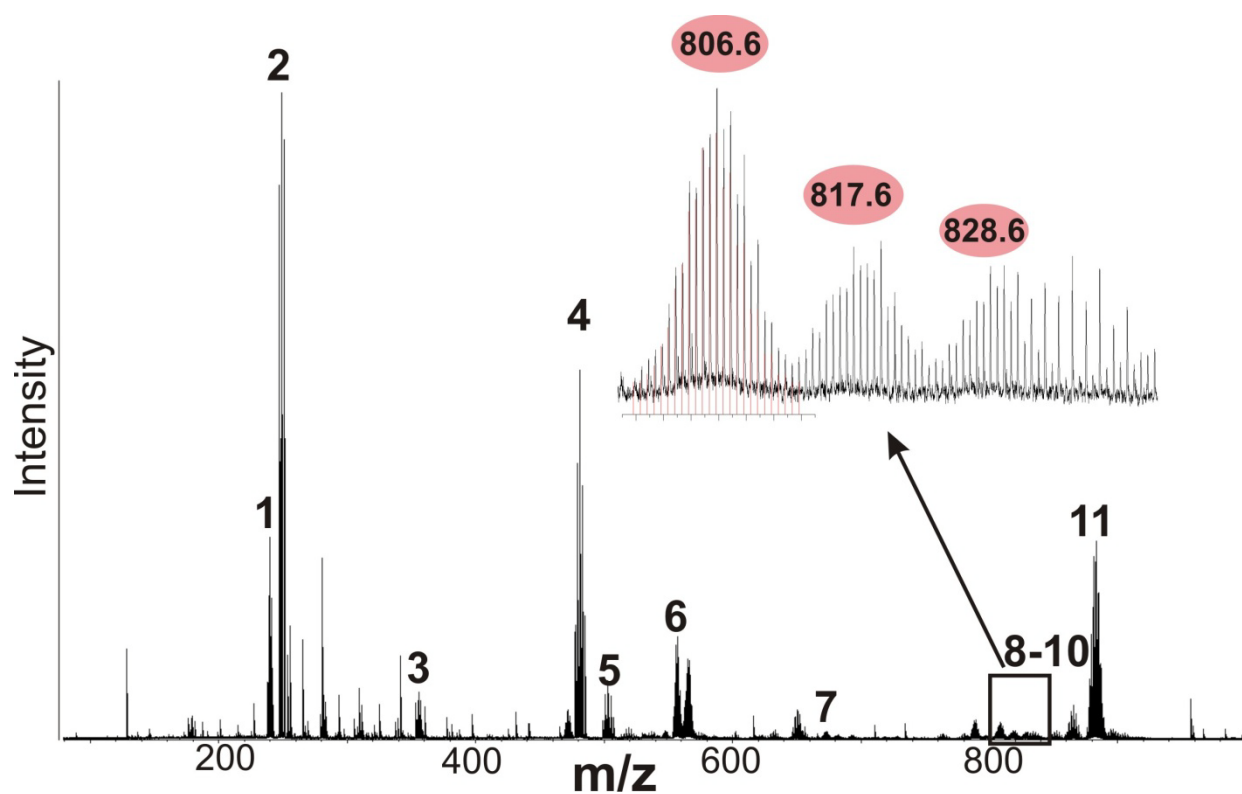

**Figure S7.** Negative ion-mode ESI-MS spectrum of  $\text{Na}_5\text{CrW}_6\text{-tris-NH}_3$  in mixed  $\text{H}_2\text{O}/\text{CH}_3\text{CN}$ . ESI-MS peak envelope of  $\text{H}_4[\text{CrW}_6\text{O}_{21}(\text{OCH}_2)_3\text{CNH}_2]^{2-}$  (experimental pattern, black; simulated pattern, red).

**Table S4.** Species assigned to the peaks in the ESI-MS spectrum  $\text{Na}_5\text{CrW}_6\text{-tris-NH}_3$  (see Fig. S7).

|    | m/z   | m/z (calc.) | Peak Assignment                                                                   |
|----|-------|-------------|-----------------------------------------------------------------------------------|
| 1  | 239.9 | 239.9       | $[\text{W}_2\text{O}_7]^{2-}$                                                     |
| 2  | 248.9 | 248.9       | $\text{H}[\text{WO}_4]^-$                                                         |
| 3  | 355.9 | 355.9       | $[\text{W}_3\text{O}_{10}]^{2-}$                                                  |
| 4  | 480.9 | 480.9       | $\text{H}[\text{W}_2\text{O}_7]^-$                                                |
| 5  | 502.8 | 502.7       | $\text{Na}[\text{W}_2\text{O}_7]^-$                                               |
| 6  | 556.6 | 556.6       | $[\text{CrW}_4\text{O}_{13}(\text{OCH}_2)_3\text{CNH}_2]^{2-}$                    |
| 7  | 672.8 | 672.8       | $[\text{CrW}_5\text{O}_{16}(\text{OCH}_2)_3\text{CNH}_2]^{2-}$                    |
| 8  | 806.6 | 806.6       | $\text{H}_3[\text{CrW}_6\text{O}_{21}(\text{OCH}_2)_3\text{CNH}_3]^{2-}$          |
| 9  | 817.6 | 817.6       | $\text{NaH}_2[\text{CrW}_6\text{O}_{21}(\text{OCH}_2)_3\text{CNH}_3]^{2-}$        |
| 10 | 828.6 | 828.6       | $\text{Na}_2\text{H}[\text{CrW}_6\text{O}_{21}(\text{OCH}_2)_3\text{CNH}_3]^{2-}$ |
| 11 | 882.6 | 882.8       | $[\text{CrW}_3\text{O}_{10}(\text{OCH}_2)_3\text{CNH}_3]^-$                       |

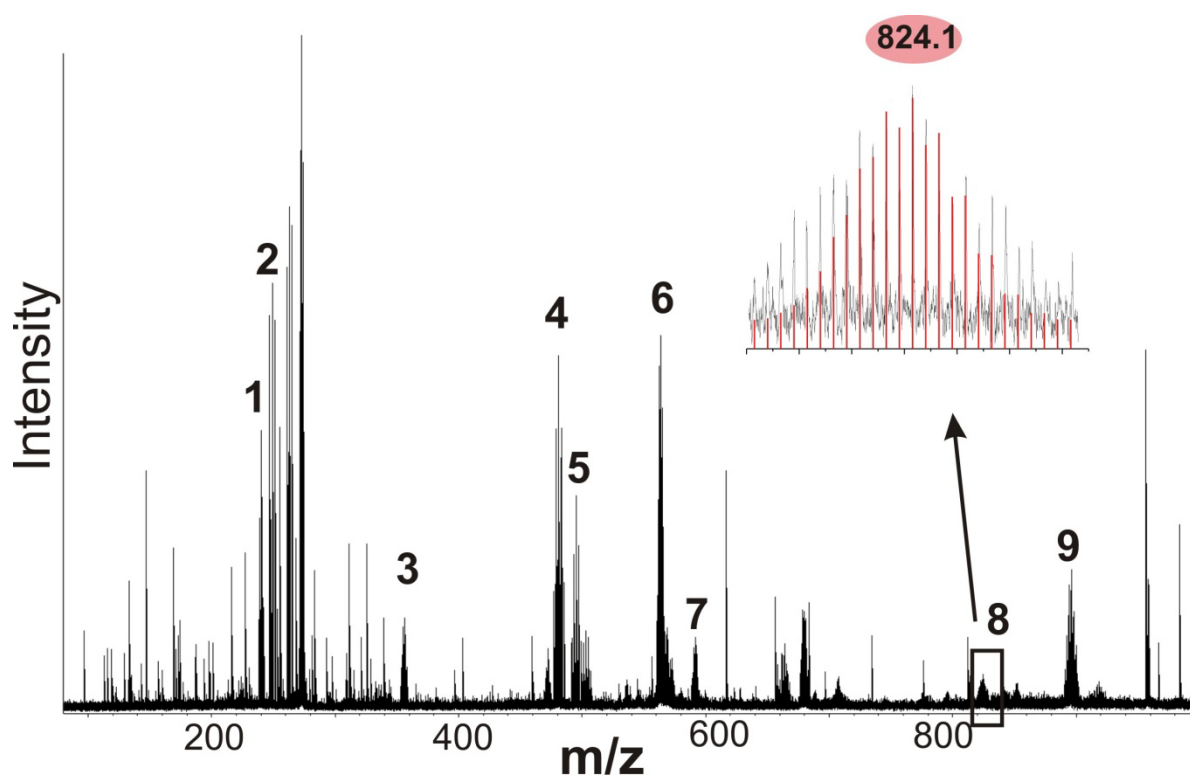

**Figure S8.** Negative ion-mode ESI-MS spectrum of  $\text{Na}_6\text{CrW}_6\text{-tris-C}_2\text{H}_5$  in mixed  $\text{H}_2\text{O}/\text{CH}_3\text{CN}$ . ESI-MS peak envelope of  $\text{NaH}_3[\text{CrW}_6\text{O}_{21}(\text{OCH}_2)_3\text{CC}_2\text{H}_5]^{2-}$  (experimental pattern, black; simulated pattern, red).

**Table S5.** Species assigned to the peaks in the ESI-MS spectrum  $\text{Na}_6\text{CrW}_6\text{-tris-C}_2\text{H}_5$  (see Fig. S8).

|   | m/z   | m/z (calc.) | Peak Assignment                                                                     |
|---|-------|-------------|-------------------------------------------------------------------------------------|
| 1 | 239.9 | 239.9       | $[\text{W}_2\text{O}_7]^{2-}$                                                       |
| 2 | 248.9 | 248.9       | $\text{H}[\text{WO}_4]^-$                                                           |
| 3 | 355.9 | 355.9       | $[\text{W}_3\text{O}_{10}]^{2-}$                                                    |
| 4 | 480.9 | 480.9       | $\text{H}[\text{W}_2\text{O}_7]^-$                                                  |
| 5 | 502.8 | 502.7       | $\text{Na}[\text{W}_2\text{O}_7]^-$                                                 |
| 6 | 563.4 | 563.4       | $[\text{CrW}_4\text{O}_{13}(\text{OCH}_2)_3\text{CC}_2\text{H}_5]^{2-}$             |
| 7 | 679.2 | 679.2       | $[\text{CrW}_5\text{O}_{16}(\text{OCH}_2)_3\text{CC}_2\text{H}_5]^{2-}$             |
| 8 | 824.1 | 824.1       | $\text{NaH}_3[\text{CrW}_6\text{O}_{21}(\text{OCH}_2)_3\text{CC}_2\text{H}_5]^{2-}$ |
| 9 | 895.7 | 895.7       | $\text{H}[\text{CrW}_3\text{O}_{10}(\text{OCH}_2)_3\text{CC}_2\text{H}_5]^-$        |



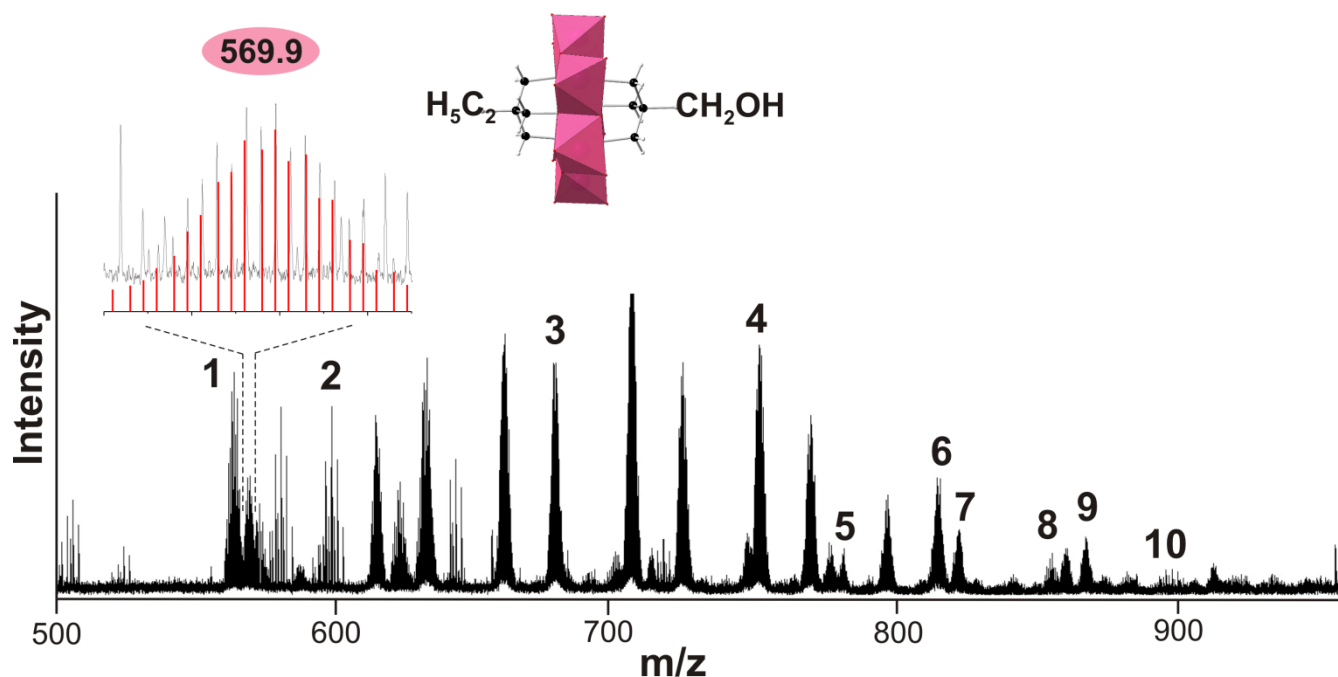

**Figure S9.** Negative ion-mode ESI-MS spectrum of the reaction mixture (30 mg of  $\text{Na}_6\text{CrW}_6\text{-tris-C}_2\text{H}_5$  with 50 mg of pentaerythritol ( $\text{Tris-CH}_2\text{OH}$ ) were dissolved in 15 mL of  $\text{H}_2\text{O}$  and heated at  $160\text{ }^\circ\text{C}$  for 48 hours) with  $\text{CH}_3\text{CN}$ . ESI-MS peak envelope of  $[\text{CrW}_6\text{O}_{18}(\text{OCH}_2)_6\text{CCH}_2\text{OH}(\text{CC}_2\text{H}_5)]^{3-}$  (experimental pattern, black; simulated pattern, red).

**Table S6.** Species assigned to the peaks in the ESI-MS spectrum of the reaction mixture after asymmetric functionalization (see Fig. S9).

|    | m/z   | m/z (calc.) | Peak Assignment                                                                                        |
|----|-------|-------------|--------------------------------------------------------------------------------------------------------|
| 1  | 564.4 | 564.4       | $[\text{CrW}_4\text{O}_{13}(\text{OCH}_2)_3\text{CCH}_2\text{OH}]^{2-}$                                |
|    | 569.9 | 569.9       | $[\text{CrW}_6\text{O}_{18}(\text{OCH}_2)_6\text{CCH}_2\text{OH}(\text{CC}_2\text{H}_5)]^{3-}$         |
| 2  | 605.8 | 605.8       | $[\text{CrW}_4\text{O}_{10}(\text{OCH}_2)_6\text{CCH}_2\text{OH}(\text{CC}_2\text{H}_5)]^{2-}$         |
| 3  | 680.2 | 680.2       | $[\text{CrW}_5\text{O}_{16}(\text{OCH}_2)_3\text{CCH}_2\text{OH}]^{2-}$                                |
| 4  | 747.4 | 747.4       | $\text{H}[\text{CrW}_5\text{O}_{16}(\text{OCH}_2)_6\text{CCH}_2\text{OH}(\text{CC}_2\text{H}_5)]^{2-}$ |
| 5  | 779.7 | 779.7       | $[\text{CrW}_3\text{O}_{11}]^-$                                                                        |
| 6  | 813.3 | 813.3       | $\text{H}_4[\text{CrW}_6\text{O}_{21}(\text{OCH}_2)_3\text{CC}_2\text{H}_5]^{2-}$                      |
| 7  | 824.1 | 824.1       | $\text{NaH}_3[\text{CrW}_6\text{O}_{21}(\text{OCH}_2)_3\text{CC}_2\text{H}_5]^{2-}$                    |
| 8  | 855.3 | 855.3       | $\text{H}[\text{Cr}((\text{OCH}_2)_3\text{CCH}_2\text{OH})_2\text{W}_6\text{O}_{18}]^{2-}$             |
| 9  | 866.3 | 866.3       | $\text{Na}[\text{Cr}((\text{OCH}_2)_3\text{CCH}_2\text{OH})_2\text{W}_6\text{O}_{18}]^{2-}$            |
| 10 | 897.8 | 897.8       | $\text{H}[\text{CrW}_3\text{O}_{10}(\text{OCH}_2)_3\text{CCH}_2\text{OH}]^-$                           |

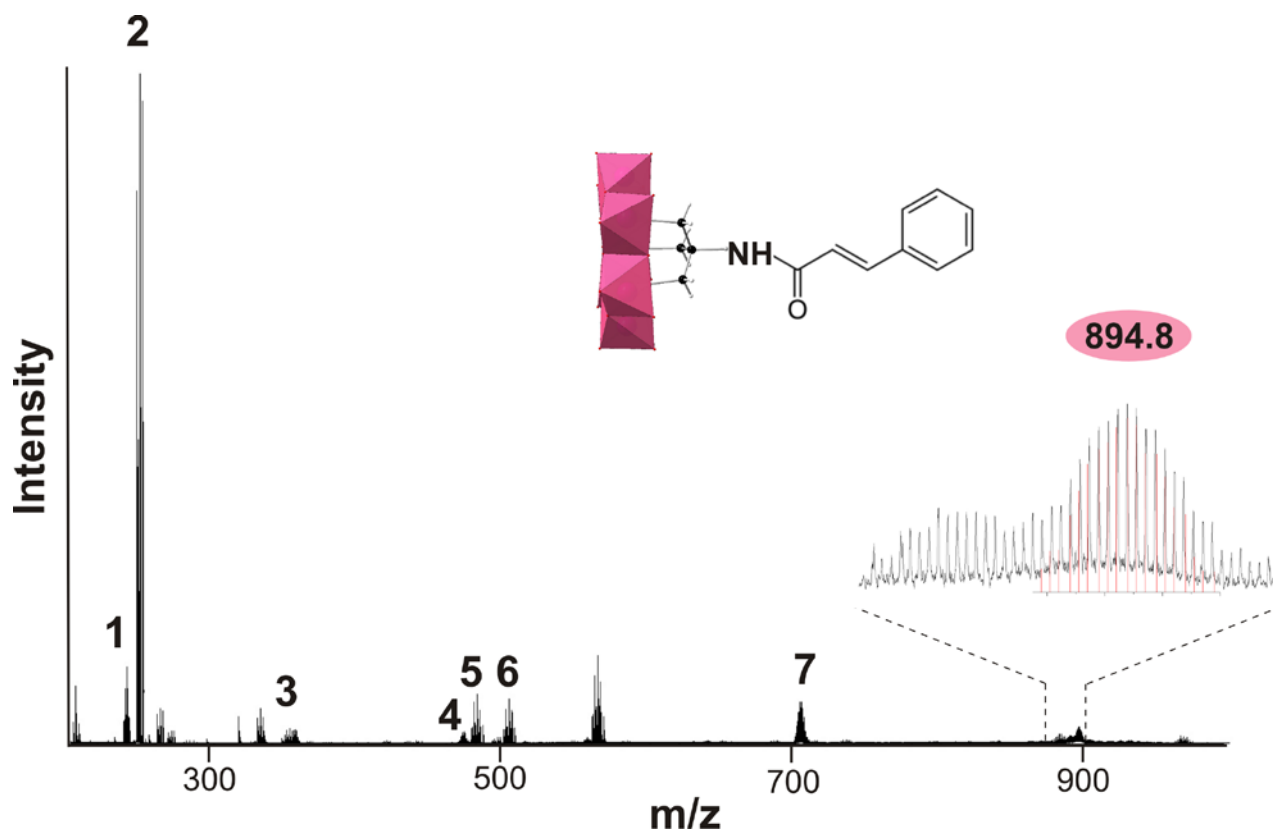

**Figure S10.** Negative ion-mode ESI-MS spectrum of the reaction mixture (300 mg of  $\text{TBA}_6\text{CrW}_6\text{-tris-NH}_2$  with 25 mg of cinnamic acid and 25 mg of EEDQ (N-ethoxycarbonyl-2-ethoxy-1,2-dihydroquinoline) were dissolved in 9.00 mL of  $\text{CH}_3\text{CN}$  and stirred at  $50^\circ\text{C}$  for 24 h). ESI-MS peak envelope of  $\text{Na}_2\text{H}_2[\text{CrW}_6\text{O}_{21}(\text{OCH}_2)_3\text{CNHC}_9\text{OH}_7]^{2-}$  (experimental pattern, black; simulated pattern, red).

**Table S7.** Species assigned to the peaks in the ESI-MS spectrum of the reaction mixture after post-functionalization (see Fig. S10).

|   | m/z          | m/z (calc.)  | Peak Assignment                                                                                                   |
|---|--------------|--------------|-------------------------------------------------------------------------------------------------------------------|
| 1 | 239.9        | 239.9        | $[\text{W}_2\text{O}_7]^{2-}$                                                                                     |
| 2 | 248.9        | 248.9        | $\text{H}[\text{WO}_4]^-$                                                                                         |
| 3 | 355.9        | 355.9        | $[\text{W}_3\text{O}_{10}]^{2-}$                                                                                  |
| 4 | 471.9        | 471.9        | $[\text{W}_4\text{O}_{13}]^{2-}$                                                                                  |
| 5 | 480.9        | 480.9        | $\text{H}[\text{W}_2\text{O}_7]^-$                                                                                |
| 6 | 502.8        | 502.7        | $\text{Na}[\text{W}_2\text{O}_7]^-$                                                                               |
| 7 | 703.8        | 703.8        | $[\text{W}_6\text{O}_{19}]^{2-}$                                                                                  |
|   | <b>894.8</b> | <b>894.8</b> | <b><math>\text{Na}_2\text{H}_2[\text{CrW}_6\text{O}_{21}(\text{OCH}_2)_3\text{CNHC}_9\text{OH}_7]^{2-}</math></b> |

#### 4. ESI-MS solution study

**ESI-MS solution preparation.** The stock solution of  $\text{Cr}^{3+} - \text{WO}_4^{2-}$  ( $C_w = 0.2 \text{ M}$ )  $- \text{H}^+$  was prepared at a molar ratio of 1:6:6 ( $\text{Cr}:\text{W}:\text{H}^+$ ) and a final pH of 5.7 as described in the synthetic section of this SI. The 0.5 ml aliquots were taken after 1, 3 and 10 days after the solution preparation and the volume was adjusted to 10 ml with  $\text{H}_2\text{O}$ . Then 0.5 ml of these solutions was made up to 5 ml with  $\text{H}_2\text{O}/\text{CH}_3\text{CN}$  1:1 mixture for direct injection into the ESI-MS system. The 2 parallel probes for the reaction mixture in the second day after solution preparation with pH of 5 and 7 were made using the diluted HCl and NaOH.

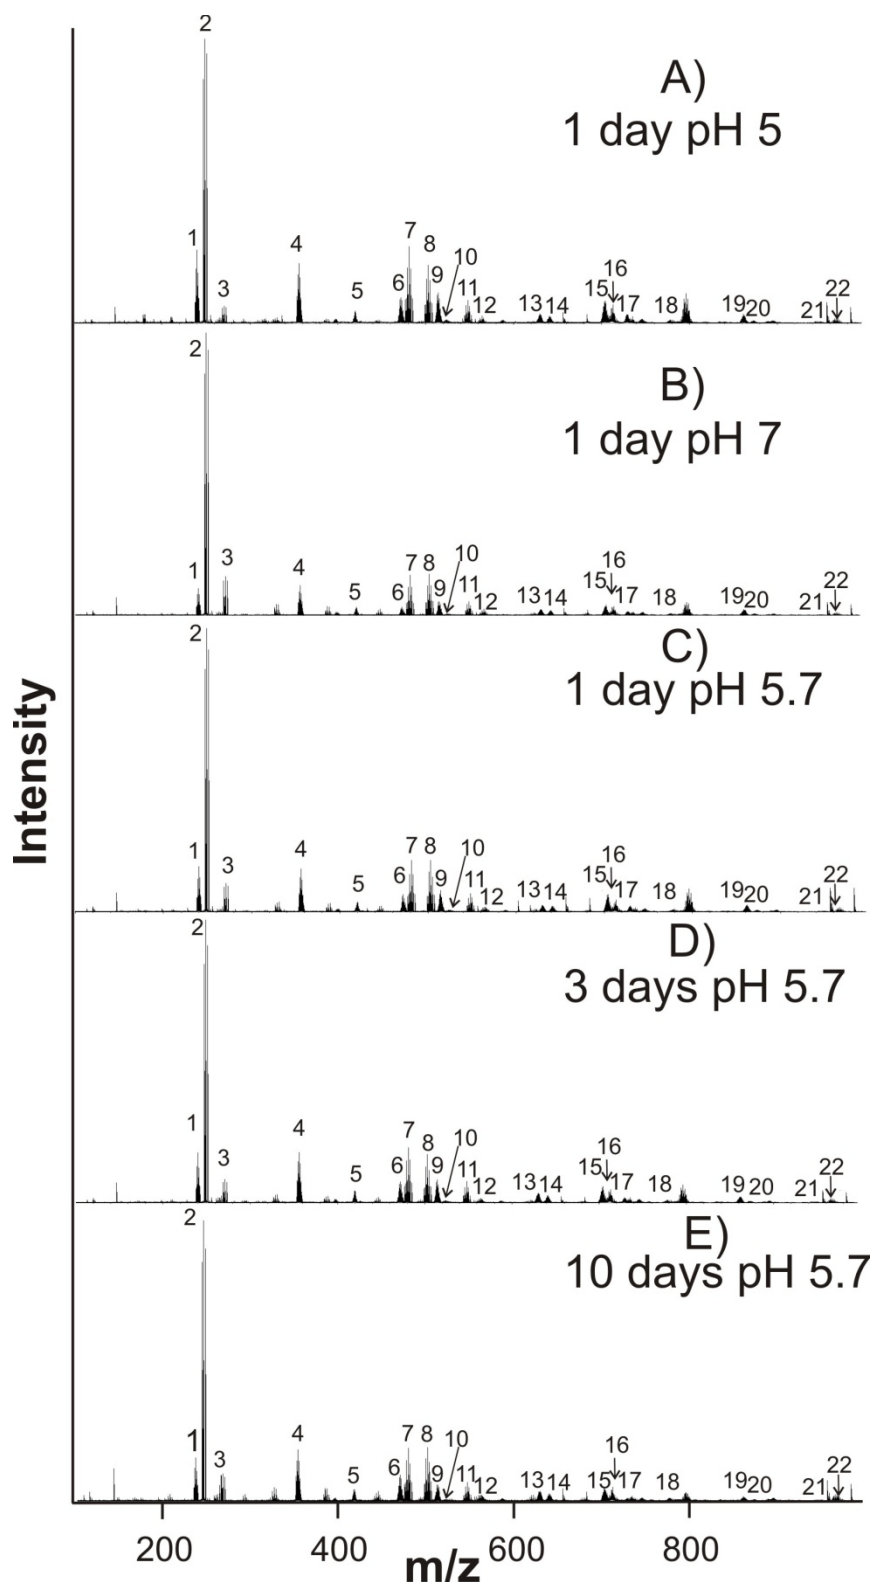

**Table S8.** Species assigned to the peaks in the ESI-MS spectra of the stock solutions  $\text{Cr}^{3+} - \text{WO}_4^{2-} - \text{H}^+$  (see Fig. S11).

|    | m/z   | m/z (calc.) | Peak assignment                             |
|----|-------|-------------|---------------------------------------------|
| 1  | 239.9 | 239.9       | $[\text{W}_2\text{O}_7]^{2-}$               |
| 2  | 248.9 | 248.9       | $\text{H}[\text{WO}_4]^-$                   |
| 3  | 270.9 | 270.9       | $\text{Na}[\text{WO}_4]^-$                  |
| 4  | 355.9 | 355.9       | $[\text{W}_3\text{O}_{10}]^{2-}$            |
| 5  | 419.9 | 419.9       | $[\text{CrW}_5\text{O}_{18}]^{3-}$          |
| 6  | 471.9 | 471.9       | $[\text{W}_4\text{O}_{13}]^{2-}$            |
| 7  | 480.9 | 480.9       | $\text{H}[\text{W}_2\text{O}_7]^-$          |
| 8  | 502.8 | 502.7       | $\text{Na}[\text{W}_2\text{O}_7]^-$         |
| 9  | 514.3 | 514.3       | $\text{H}[\text{CrW}_4\text{O}_{15}]^{2-}$  |
| 10 | 525.3 | 525.3       | $\text{Na}[\text{CrW}_4\text{O}_{15}]^{2-}$ |
| 11 | 547.8 | 547.8       | $[\text{CrW}_2\text{O}_8]^-$                |
| 12 | 587.8 | 587.8       | $[\text{W}_5\text{O}_{16}]^{2-}$            |
| 13 | 630.3 | 630.3       | $\text{H}[\text{CrW}_5\text{O}_{18}]^{2-}$  |
| 14 | 641.3 | 641.3       | $\text{Na}[\text{CrW}_5\text{O}_{18}]^{2-}$ |
| 15 | 703.8 | 703.8       | $[\text{W}_6\text{O}_{19}]^{2-}$            |
| 16 | 712.8 | 712.8       | $\text{H}[\text{W}_3\text{O}_{10}]^-$       |
| 17 | 734.8 | 734.8       | $\text{Na}[\text{W}_3\text{O}_{10}]^-$      |
| 18 | 779.7 | 779.7       | $[\text{CrW}_3\text{O}_{11}]^-$             |
| 19 | 862.2 | 862.2       | $\text{H}[\text{CrW}_7\text{O}_{24}]^{2-}$  |
| 20 | 873.2 | 873.2       | $\text{Na}[\text{CrW}_7\text{O}_{24}]^{2-}$ |
| 21 | 944.7 | 944.7       | $\text{H}[\text{W}_4\text{O}_{13}]^-$       |
| 22 | 966.7 | 966.7       | $\text{Na}[\text{W}_4\text{O}_{13}]^-$      |

**Figure S11.** Negative ion-mode ESI-MS spectra of stock solutions  $\text{Cr}^{3+} - \text{WO}_4^{2-} - \text{H}^+$  measured after 1, 3 and 10 days and at different pH (5.7; 5; 7) for the solution after 1 day of reaction. All spectra do not contain signals at  $m/z = 515.19$ ,  $773.29$  or  $784.27$  assigned to  $[\text{Cr}(\text{OH})_6\text{W}_6\text{O}_{18}]^{3-}$ ,  $\text{H}[\text{Cr}(\text{OH})_6\text{W}_6\text{O}_{18}]^{2-}$  and  $\text{Na}[\text{Cr}(\text{OH})_6\text{W}_6\text{O}_{18}]^{2-}$ , respectively.

For real-time observation of the self-assembly of  $\text{CrW}_6\text{-(tris-C}_2\text{H}_5)_2$  under hydrothermal condition the 0.5 ml aliquots of the reaction solution (prepared as described in the synthetic section of this SI) were taken after 12, 24 and 48 hours from the moment the reaction has been started.

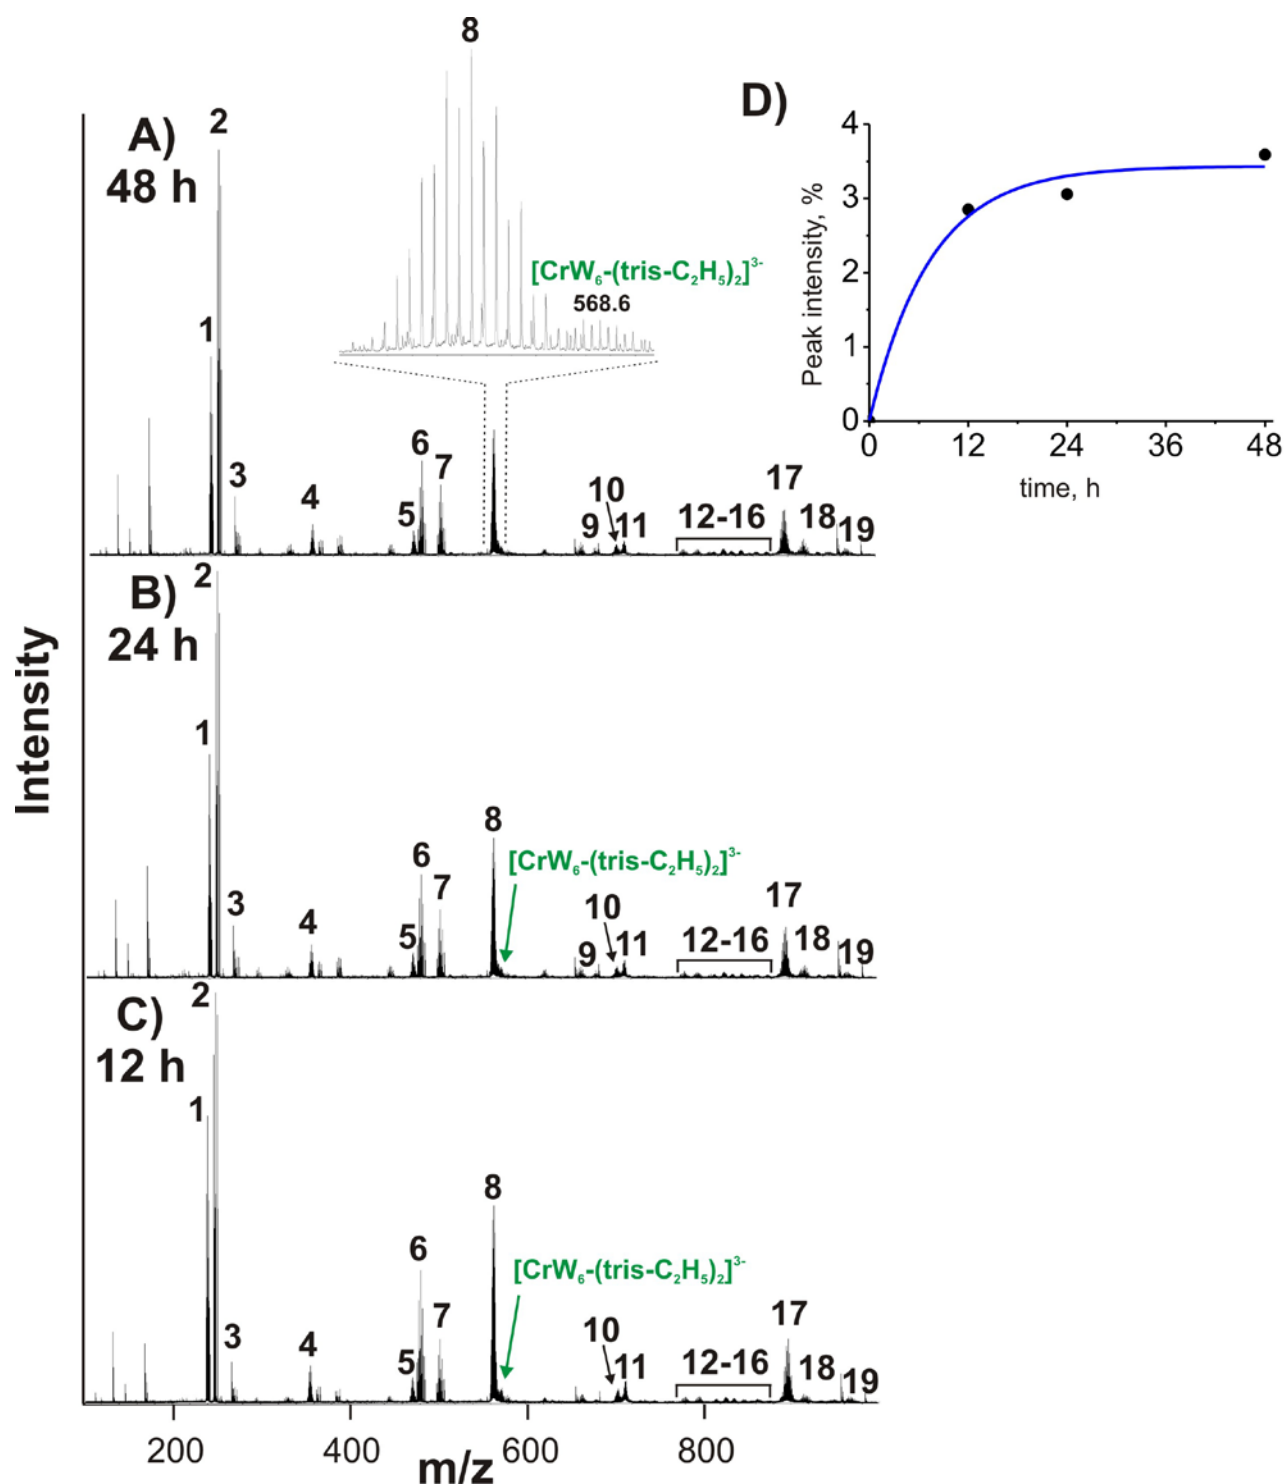

**Figure S12.** Negative ion-mode ESI-MS spectra of reaction (HT, 160 °C) solutions  $\text{Cr}^{3+} - \text{WO}_4^{2-} - \text{H}^+ - \text{Tris-C}_2\text{H}_5$  measured after 12 (C), 24 (B) and 48 (A) hours from the moment the reaction has been started. The assigned peaks (Table S8) were found in all spectra. All spectra do not contain signals at  $m/z = 515.19$ ,  $773.29$  or  $784.27$  assigned to  $[\text{Cr}(\text{OH})_6\text{W}_6\text{O}_{18}]^{3-}$ ,  $\text{H}[\text{Cr}(\text{OH})_6\text{W}_6\text{O}_{18}]^{2-}$  and  $\text{Na}[\text{Cr}(\text{OH})_6\text{W}_6\text{O}_{18}]^{2-}$ , respectively. Graphs (D) shows the general trend of increasing peak intensity of the target anion  $[\text{Cr}((\text{OCH}_2)_3\text{CC}_2\text{H}_5)_2\text{W}_6\text{O}_{18}]^{3-}$ .

**Table S9.** Species assigned to the peaks in the ESI-MS spectra of the reaction solution of  $\text{Cr}^{3+}$  –  $\text{WO}_4^{2-}$  –  $\text{H}^+$  – Tris- $\text{C}_2\text{H}_5$  (see Fig. S12).

|    | <b>m/z</b>   | <b>m/z (calc.)</b> | <b>Peak Assignment</b>                                                                                                |
|----|--------------|--------------------|-----------------------------------------------------------------------------------------------------------------------|
| 1  | 239.9        | 239.9              | $[\text{W}_2\text{O}_7]^{2-}$                                                                                         |
| 2  | 248.9        | 248.9              | $\text{H}[\text{WO}_4]^-$                                                                                             |
| 3  | 270.9        | 270.9              | $\text{Na}[\text{WO}_4]^-$                                                                                            |
| 4  | 355.9        | 355.9              | $[\text{W}_3\text{O}_{10}]^{2-}$                                                                                      |
| 5  | 471.9        | 471.9              | $[\text{W}_4\text{O}_{13}]^{2-}$                                                                                      |
| 6  | 480.9        | 480.9              | $\text{H}[\text{W}_2\text{O}_7]^-$                                                                                    |
| 7  | 502.8        | 502.7              | $\text{Na}[\text{W}_2\text{O}_7]^-$                                                                                   |
| 8  | 563.4        | 563.4              | $[\text{CrW}_4\text{O}_{13}(\text{OCH}_2)_3\text{CC}_2\text{H}_5]^{2-}$                                               |
|    | <b>568.6</b> | <b>568.6</b>       | <b><math>[\text{Cr}((\text{OCH}_2)_3\text{CC}_2\text{H}_5)_2\text{W}_6\text{O}_{18}]^{3-}</math></b>                  |
| 9  | 679.2        | 679.2              | $[\text{CrW}_5\text{O}_{16}(\text{OCH}_2)_3\text{CC}_2\text{H}_5]^{2-}$                                               |
| 10 | 703.8        | 703.8              | $[\text{W}_6\text{O}_{19}]^{2-}$                                                                                      |
| 11 | 712.8        | 712.8              | $\text{H}[\text{W}_3\text{O}_{10}]^-$                                                                                 |
| 12 | 779.7        | 779.7              | $[\text{CrW}_3\text{O}_{11}]^-$                                                                                       |
| 13 | <b>835.3</b> | <b>835.3</b>       | <b><math>\text{Na}_2\text{H}_2[\text{Cr}(\text{OCH}_2)_3\text{CC}_2\text{H}_5\text{W}_6\text{O}_{21}]^{2-}</math></b> |
| 14 | <b>845.8</b> | <b>845.8</b>       | <b><math>\text{Na}_3\text{H}[\text{Cr}(\text{OCH}_2)_3\text{CC}_2\text{H}_5\text{W}_6\text{O}_{21}]^{2-}</math></b>   |
| 15 | <b>853.4</b> | <b>853.4</b>       | <b><math>\text{H}[\text{Cr}((\text{OCH}_2)_3\text{CC}_2\text{H}_5)_2\text{W}_6\text{O}_{18}]^{2-}</math></b>          |
| 16 | <b>864.3</b> | <b>864.3</b>       | <b><math>\text{Na}[\text{Cr}((\text{OCH}_2)_3\text{CC}_2\text{H}_5)_2\text{W}_6\text{O}_{18}]^{2-}</math></b>         |
| 17 | 895.7        | 895.7              | $\text{H}[\text{CrW}_3\text{O}_{10}(\text{OCH}_2)_3\text{CC}_2\text{H}_5]^-$                                          |
| 18 | 944.7        | 944.7              | $\text{H}[\text{W}_4\text{O}_{13}]^-$                                                                                 |
| 19 | 966.7        | 966.7              | $\text{Na}[\text{W}_4\text{O}_{13}]^-$                                                                                |

## 5. Electrochemistry

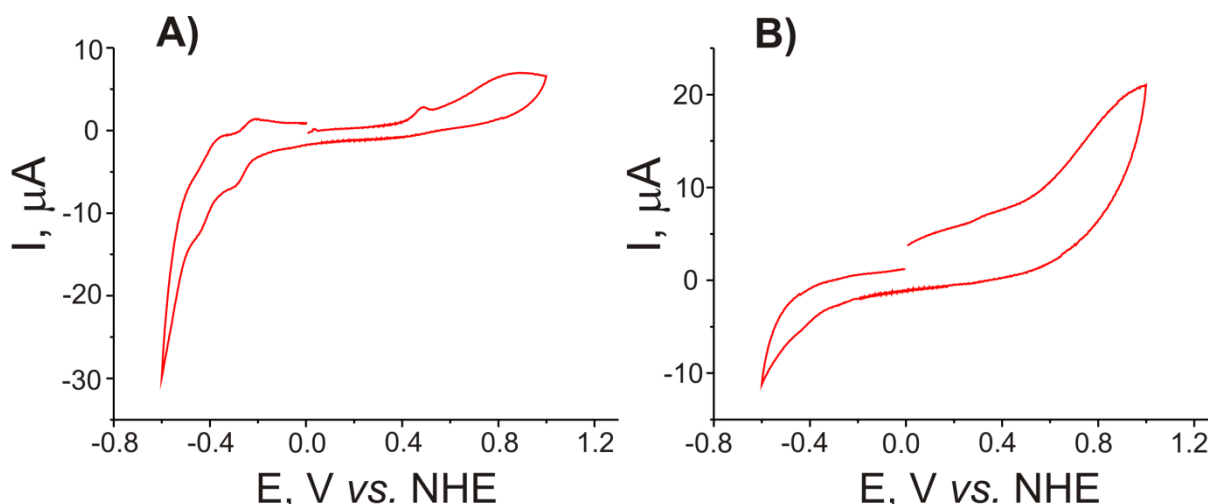

**Figure S13.** Cyclic voltammogram of 2mM solutions of  $\text{CrW}_6\text{-tris-C}_2\text{H}_5$  (A) and  $\text{CrW}_6\text{-(tris-C}_2\text{H}_5)_2$  (B) at scan rate of  $0.100 \text{ V}\cdot\text{s}^{-1}$  at a glassy carbon electrode ( $d = 3 \text{ mm}$ ) vs. normal hydrogen electrode (NHE) in 1 M acetate buffer with pH 5.7.

## 6. X-ray Crystallography

The X-ray data were measured on a Bruker D8 Venture equipped with a multilayer monochromator, MoK $\alpha$  INCOATEC micro focus sealed tube and Kryoflex cooling device. The structure was solved by direct methods and refined by full-matrix least-squares. Non-hydrogen atoms were refined with anisotropic displacement parameters. Hydrogen atoms were inserted at calculated positions and refined with riding coordinates. The following software was used for the structure solving procedure: Frame integration, Bruker SAINT software package<sup>1</sup> using a narrow-frame algorithm (absorption correction), SADABS<sup>2</sup> (structure solution), SHELXS-2013<sup>3</sup> (refinement), SHELXL-2013,<sup>3</sup> OLEX2,<sup>4</sup> SHELXLE<sup>5</sup> (molecular diagrams), OLEX2.<sup>4</sup> Experimental data and CCDC-codes can be found in Table S10.

$\text{Na}_6[\text{Cr}(\text{OH})_3\text{W}_6\text{O}_{21}]\cdot 21.75\text{H}_2\text{O}$  originally synthesized and crystallized by Kortz et al.<sup>6</sup>, was synthesized and crystallized by an alternative procedure: 30 mL of an aqueous solution containing  $\text{Na}_2\text{WO}_4\cdot 2\text{H}_2\text{O}$  (3.3 g, 10 mmol) was heated at approximately  $80 \text{ }^\circ\text{C}$ , followed by the addition of 0.1 g of boric acid. The final pH of the solution was adjusted to 7 with diluted HCl (1 M).  $\text{CrCl}_3\cdot 6\text{H}_2\text{O}$  (0.54 g, 2 mmol) dissolved in 2 mL water was added dropwise. A light turbidity occurred and it was waited until the solution cleared again before adding the next drop. After the complete addition of the  $\text{CrCl}_3\cdot 6\text{H}_2\text{O}$  solution, the mixture remained turbid. The final pH of 8 was adjusted by addition of diluted NaOH (1 M). The solution was stirred and heated to approximately  $80 \text{ }^\circ\text{C}$  for half an hour. Afterwards the solution was cooled down to room temperature, centrifuged to remove unreacted educts and transferred to crystallization beakers. After several weeks, green single crystals were obtained.<sup>7</sup>

**Table S10.** Crystallographic data.

|                                                 | <b>CrW<sub>6</sub>-tris-C<sub>2</sub>H<sub>5</sub>)<sub>2</sub></b>                                                                       | <b>CrW<sub>6</sub>-tris-C<sub>2</sub>H<sub>5</sub></b>                                                                              | <b>CrW<sub>6</sub>-tris-NH<sub>2</sub></b>                                                                                                  | <b>CrW<sub>6</sub>-tris-CH<sub>2</sub>OH</b>                                                                                        | <b>CrW<sub>6</sub></b>                                                                                                                    |
|-------------------------------------------------|-------------------------------------------------------------------------------------------------------------------------------------------|-------------------------------------------------------------------------------------------------------------------------------------|---------------------------------------------------------------------------------------------------------------------------------------------|-------------------------------------------------------------------------------------------------------------------------------------|-------------------------------------------------------------------------------------------------------------------------------------------|
| Empirical formula                               | C <sub>12</sub> H <sub>44</sub> CrNa <sub>3</sub> O <sub>37</sub> W <sub>6</sub>                                                          | C <sub>6</sub> H <sub>20</sub> CrK <sub>3</sub> Na <sub>3</sub> O <sub>31</sub> W <sub>6</sub><br>[+ solvent]                       | C <sub>4</sub> H <sub>28</sub> CrNNa <sub>5</sub> O <sub>41</sub> W <sub>6</sub>                                                            | C <sub>13</sub> H <sub>65</sub> CrN <sub>2</sub> Na <sub>4</sub> O <sub>44</sub> W <sub>6</sub>                                     | CrH <sub>43.5</sub> Na <sub>6</sub> O <sub>45.75</sub> W <sub>6</sub>                                                                     |
| CCDC/CSD                                        | <b>1842741</b>                                                                                                                            | <b>1842742</b>                                                                                                                      | <b>1842739</b>                                                                                                                              | <b>1842740</b>                                                                                                                      | <b>1870211</b>                                                                                                                            |
| Formula weight M <sub>r</sub>                   | 2004.56                                                                                                                                   | 1935.73                                                                                                                             | 2016.32                                                                                                                                     | 2182.66                                                                                                                             | 2068.89                                                                                                                                   |
| Crystal system                                  | monoclinic                                                                                                                                | monoclinic                                                                                                                          | triclinic                                                                                                                                   | monoclinic                                                                                                                          | triclinic                                                                                                                                 |
| Space group                                     | <i>C2/c</i>                                                                                                                               | <i>C2/m</i>                                                                                                                         | <i>P1</i>                                                                                                                                   | <i>Cc</i>                                                                                                                           | <i>P1</i>                                                                                                                                 |
| T, K                                            | 100                                                                                                                                       | 100                                                                                                                                 | 200                                                                                                                                         | 100                                                                                                                                 | 200                                                                                                                                       |
| a, b, c (Å)                                     | 27.9468(17), 11.8789(6),<br>13.1267(6)                                                                                                    | 22.7813(14), 13.0347(8),<br>18.2057(11)                                                                                             | 11.7546(6), 15.9479(8),<br>22.9680(12)                                                                                                      | 23.0969(9), 12.9414(4),<br>17.2931(6)                                                                                               | 11.642(2), 12.341(3),<br>16.526(3)                                                                                                        |
| α, β, γ (°)                                     | 90, 101.792(3), 90                                                                                                                        | 90, 112.130(2), 90                                                                                                                  | 71.809(2), 83.295(2),<br>79.051(3)                                                                                                          | 90, 103.067(2), 90                                                                                                                  | 68.37(3), 85.30(3),<br>71.06(3)                                                                                                           |
| V (Å <sup>3</sup> )                             | 4265.8(4)                                                                                                                                 | 5007.9(5)                                                                                                                           | 4008.3(4)                                                                                                                                   | 5035.2(3)                                                                                                                           | 2085.6(9)                                                                                                                                 |
| Z                                               | 4                                                                                                                                         | 8                                                                                                                                   | 4                                                                                                                                           | 8                                                                                                                                   | 2                                                                                                                                         |
| D <sub>calc</sub> , g/cm <sup>3</sup>           | 3.124                                                                                                                                     | 2.568                                                                                                                               | 3.294                                                                                                                                       | 2.878                                                                                                                               | 3.294                                                                                                                                     |
| μ, mm <sup>-1</sup>                             | 16.494                                                                                                                                    | 29.619                                                                                                                              | 17.579                                                                                                                                      | 14.003                                                                                                                              | 16.915                                                                                                                                    |
| Abs. correct. type                              | multi-scan                                                                                                                                | multi-scan                                                                                                                          | multi-scan                                                                                                                                  | multi-scan                                                                                                                          | multi-scan                                                                                                                                |
| Abs. correct. Tmin                              | 0.008                                                                                                                                     | 0.135                                                                                                                               | 0.104                                                                                                                                       | 0.02                                                                                                                                | 0.015                                                                                                                                     |
| Abs. correct. Tmax                              | 0.039                                                                                                                                     | 0.324                                                                                                                               | 0.493                                                                                                                                       | 0.018                                                                                                                               | 0.050                                                                                                                                     |
| F(000)                                          | 3652.0                                                                                                                                    | 3460.0                                                                                                                              | 3640.0                                                                                                                                      | 4040.0                                                                                                                              | 1887.0                                                                                                                                    |
| Crystal size, mm                                | 0.25 × 0.25 × 0.05                                                                                                                        | 0.23 × 0.11 × 0.05                                                                                                                  | 0.11 × 0.09 × 0.02                                                                                                                          |                                                                                                                                     |                                                                                                                                           |
| Theta range for data collection                 | 2.35 – 30.10                                                                                                                              | 1.99 – 36.45                                                                                                                        | 2.46 – 33.59                                                                                                                                | 3.14 – 33.30                                                                                                                        | 2.21 – 30.3078                                                                                                                            |
| Index ranges                                    | –33 ≤ h ≤ 33<br>–14 ≤ k ≤ 14<br>–15 ≤ l ≤ 15                                                                                              | –28 ≤ h ≤ 28<br>–16 ≤ k ≤ 16<br>–22 ≤ l ≤ 22                                                                                        | –14 ≤ h ≤ 14<br>–19 ≤ k ≤ 19<br>–27 ≤ l ≤ 27                                                                                                | –27 ≤ h ≤ 27<br>–15 ≤ k ≤ 15<br>–20 ≤ l ≤ 20                                                                                        | –14 ≤ h ≤ 14<br>–14 ≤ k ≤ 14<br>–19 ≤ l ≤ 19                                                                                              |
| Reflections collected                           | 42215                                                                                                                                     | 35802                                                                                                                               | 87589                                                                                                                                       | 47755                                                                                                                               | 43007                                                                                                                                     |
| Rint                                            | 0.0411                                                                                                                                    | 0.0602                                                                                                                              | 0.0331                                                                                                                                      | 0.0317                                                                                                                              | 0.0358                                                                                                                                    |
| Data / restraints / parameters                  | 3875/21/287                                                                                                                               | 5183/27/279                                                                                                                         | 14657/122/1093                                                                                                                              | 9159/110/711                                                                                                                        | 7615/522/598                                                                                                                              |
| Goodness-of-fit on F <sup>2</sup>               | 1.075                                                                                                                                     | 1.121                                                                                                                               | 1.061                                                                                                                                       | 1.162                                                                                                                               | 1.096                                                                                                                                     |
| Final R indices                                 | R <sub>F</sub> = 0.0330,<br>wR <sup>2</sup> = 0.1023<br>(all data)<br>R <sub>F</sub> = 0.0313,<br>wR <sup>2</sup> = 0.1047<br>(I > 2σ(I)) | R <sub>F</sub> = 0.0611, wR <sup>2</sup> = 0.1564<br>(all data)<br>R <sub>F</sub> = 0.0585, wR <sup>2</sup> = 0.1595<br>(I > 2σ(I)) | R <sub>F</sub> = 0.03220,<br>wR <sup>2</sup> = 0.0614<br>(all data)<br>R <sub>F</sub> = 0.02556,<br>wR <sup>2</sup> = 0.0643<br>(I > 2σ(I)) | R <sub>F</sub> = 0.0284, wR <sup>2</sup> = 0.0712<br>(all data)<br>R <sub>F</sub> = 0.0282, wR <sup>2</sup> = 0.0713<br>(I > 2σ(I)) | R <sub>F</sub> = 0.0358,<br>wR <sup>2</sup> = 0.0738<br>(all data)<br>R <sub>F</sub> = 0.0299,<br>wR <sup>2</sup> = 0.0684<br>(I > 2σ(I)) |
| Largest diff. peak and hole, e. Å <sup>-3</sup> | 1.95/-1.94                                                                                                                                | 0.42/-2.14                                                                                                                          | 3.11/-1.43                                                                                                                                  | 0.60/-1.82                                                                                                                          | 2.68/-2.30                                                                                                                                |

## 7. Bond valence sum (BVS) calculation

BVS calculation<sup>8,9</sup> was applied to locate the protonation state of  $\mu_3$ -O oxygen atoms in **CrW<sub>6</sub>-tris-R** and in the parent  $[\text{Cr}(\text{OH})_3\text{W}_6\text{O}_{21}]^{6-}$  synthesized in this work (**Table S11**).

**Table S11.** Bond valence sum values for  $\mu_3$ -O atoms in **CrW<sub>6</sub>-tris-R** (R=-C<sub>2</sub>H<sub>5</sub>, -NH<sub>2</sub>, -CH<sub>2</sub>OH), which do not connect to the tris-ligand (blue in the figure), and for the six  $\mu_3$ -O atoms in  $[\text{Cr}(\text{OH})_3\text{W}_6\text{O}_{21}]^{6-}$ .

|                                                                                   |                                                                                        |            |                                                              |            |                                                                |            |
|-----------------------------------------------------------------------------------|----------------------------------------------------------------------------------------|------------|--------------------------------------------------------------|------------|----------------------------------------------------------------|------------|
| 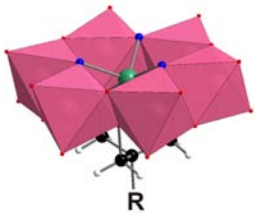 | <b>CrW<sub>6</sub>-tris-C<sub>2</sub>H<sub>5</sub></b><br>(CCDC 1842742)               |            | <b>CrW<sub>6</sub>-tris-NH<sub>2</sub></b><br>(CCDC 1842739) |            | <b>CrW<sub>6</sub>-tris-CH<sub>2</sub>OH</b><br>(CCDC 1842740) |            |
|                                                                                   | Atom                                                                                   | BVS values | Atom                                                         | BVS values | Atom                                                           | BVS values |
|                                                                                   | O3                                                                                     | -1.73      | O12                                                          | -1.73      | O3                                                             | -1.69      |
|                                                                                   | O9                                                                                     | -1.65      | O13                                                          | -1.72      | O13                                                            | -1.68      |
|                                                                                   |                                                                                        |            | O15                                                          | -1.74      | O22                                                            | -1.70      |
|  | <b><math>[\text{Cr}(\text{OH})_3\text{W}_6\text{O}_{21}]^{6-}</math></b> (CSD 1870211) |            |                                                              |            |                                                                |            |
|                                                                                   | Atom                                                                                   | BVS values | Atom                                                         | BVS values | Atom                                                           | BVS values |
|                                                                                   | O1                                                                                     | -1.73      | O3                                                           | -1.71      | O5                                                             | -1.72      |
|                                                                                   | O2                                                                                     | -1.18      | O4                                                           | -1.22      | O6                                                             | -1.11      |

## 8. DFT Calculations

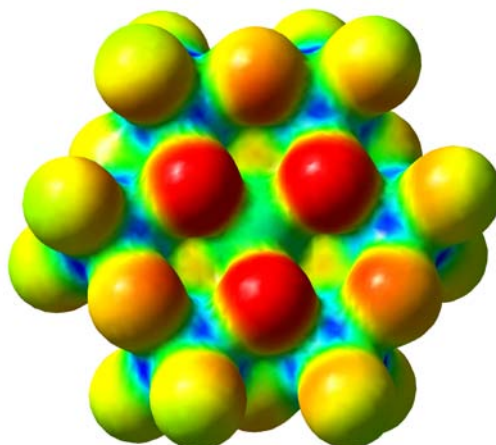

**Figure S14.** Molecular electrostatic potential for non-protonated CrW<sub>6</sub>. Red identifies more nucleophilic regions and green denotes less nucleophilic regions. The colour vs. potential ranges from -1.089 (red) to -0.650 (blue).



**Table S12.** Relative enthalpies with respect to the monoprotonated **CrW<sub>6</sub>** anion (proton on a triply-bridging oxygen ( $\mu_3$ -O)),  $[\text{Cr}(\mu_3\text{-OH})_1\text{W}_6\text{O}_{23}]^{8-}$ .

| Anion                                                           | $\Delta\text{H}$<br>(kcal·mol <sup>-1</sup> ) |
|-----------------------------------------------------------------|-----------------------------------------------|
| $[\text{Cr}(\mu_3\text{-OH})_1\text{W}_6\text{O}_{23}]^{8-}$    | 0                                             |
| $[\text{Cr}(\text{O}_t\text{H})_1\text{W}_6\text{O}_{23}]^{8-}$ | +4.4                                          |
| $[\text{Cr}(\mu_2\text{-OH})_1\text{W}_6\text{O}_{23}]^{8-}$    | +11.2                                         |

All structures were optimised and the vibrational modes were calculated with PBE0 exchange-correlation functional, the def2-TZVP basis set, and PCM as solvent model.  $[\text{Cr}(\text{O}_t\text{H})_1\text{W}_6\text{O}_{23}]^{8-}$  and  $[\text{Cr}(\mu_2\text{-OH})_1\text{W}_6\text{O}_{23}]^{8-}$  are the monoprotonated **CrW<sub>6</sub>**, exhibiting the proton on a terminal oxygen ( $\text{O}_t$ ) or doubly-bridging oxygen ( $\mu_2$ -O) atom, respectively (see structures in the supplement xyz file).

**Table S13.** Relative enthalpies and relative enthalpies difference (in parenthesis) with respect to  $\text{fac}_1\text{-}[\text{Cr}(\text{OH})_3\text{W}_6\text{O}_{22}]^{6-}$  with different level of theory.

| Anion                                                                      | $\Delta\text{H}_{\text{PBE0}}$<br>(kcal·mol <sup>-1</sup> ) | $\Delta\text{H}_{\text{PBE}}$<br>( $\Delta\text{H}_{\text{PBE}}\text{-}\Delta\text{H}_{\text{PBE0}}$ )<br>(kcal·mol <sup>-1</sup> ) | $\Delta\text{H}_{\text{B3LYP}}$<br>( $\Delta\text{H}_{\text{PBE}}\text{-}\Delta\text{H}_{\text{PBE0}}$ )<br>(kcal·mol <sup>-1</sup> ) |
|----------------------------------------------------------------------------|-------------------------------------------------------------|-------------------------------------------------------------------------------------------------------------------------------------|---------------------------------------------------------------------------------------------------------------------------------------|
| $\text{fac}_1\text{-}[\text{Cr}(\text{OH})_3\text{W}_6\text{O}_{21}]^{6-}$ | 0                                                           | 0                                                                                                                                   | 0                                                                                                                                     |
| $\text{mer}\text{-}[\text{Cr}(\text{OH})_3\text{W}_6\text{O}_{21}]^{6-}$   | +3.7                                                        | +2.9<br>(+0.8)                                                                                                                      | +3.3<br>(+0.4)                                                                                                                        |
| $\text{fac}_2\text{-}[\text{Cr}(\text{OH})_3\text{W}_6\text{O}_{21}]^{6-}$ | +7.4                                                        | +6.6<br>(+0.8)                                                                                                                      | +7.7<br>(+0.3)                                                                                                                        |

All structures were optimised and the vibrational modes were calculated with the indicated exchange-correlation functional, the def2-TZVP basis set, and PCM as solvent model.

**Table S14.** Spin angular momentum, enthalpy, entropy and Gibbs free energy for the different protonation states of  $[\text{Cr}(\text{OH})_x\text{W}_6\text{O}_{24-x}]^{(9-x)-}$  ( $x = 0 - 6$ ).

| Species                                                                    | $S^{2,a}$ | $\epsilon$ (a.u.) | H (a.u.)     | S (cal/mol.K) | G (a.u.)     |
|----------------------------------------------------------------------------|-----------|-------------------|--------------|---------------|--------------|
| $[\text{CrW}_6\text{O}_{24}]^{9-}$                                         | 3.7730    | -3253.84188071    | -3253.724951 | 218.781       | -3253.828901 |
| $[\text{Cr}(\mu_3\text{-OH})_1\text{W}_6\text{O}_{23}]^{8-b}$              | 3.7718    | -3254.37144161    | -3254.241943 | 217.040       | -3254.345065 |
| $[\text{Cr}(\mu_2\text{-OH})_1\text{W}_6\text{O}_{23}]^{8-b}$              | 3.7742    | -3254.35329294    | -3254.224070 | 219.700       | -3254.328457 |
| $[\text{Cr}(\text{O}_t\text{H})_1\text{W}_6\text{O}_{23}]^{8-b}$           | 3.7723    | -3254.36408191    | -3254.235001 | 217.989       | -3254.338574 |
| $\text{iso1}\text{-}[\text{Cr}(\text{OH})_2\text{W}_6\text{O}_{22}]^{7-}$  | 3.7703    | -3254.89078691    | -3254.749180 | 221.059       | -3254.854212 |
| $\text{iso2}\text{-}[\text{Cr}(\text{OH})_2\text{W}_6\text{O}_{22}]^{7-}$  | 3.7696    | -3254.89074360    | -3254.749020 | 220.503       | -3254.853788 |
| $\text{iso3}\text{-}[\text{Cr}(\text{OH})_2\text{W}_6\text{O}_{22}]^{7-}$  | 3.7714    | -3254.88522730    | -3254.743162 | 218.743       | -3254.847094 |
| $\text{fac}_1\text{-}[\text{Cr}(\text{OH})_3\text{W}_6\text{O}_{21}]^{6-}$ | 3.7685    | -3255.40019215    | -3255.246100 | 220.793       | -3255.351006 |
| $\text{mer}\text{-}[\text{Cr}(\text{OH})_3\text{W}_6\text{O}_{21}]^{6-}$   | 3.7692    | -3255.39438401    | -3255.240089 | 223.137       | -3255.346109 |
| $\text{fac}_2\text{-}[\text{Cr}(\text{OH})_3\text{W}_6\text{O}_{21}]^{6-}$ | 3.7707    | -3255.38841724    | -3255.234251 | 225.706       | -3255.341491 |

|                                                                                  |        |                |              |         |              |
|----------------------------------------------------------------------------------|--------|----------------|--------------|---------|--------------|
| <i>iso1</i> -[Cr(OH) <sub>4</sub> W <sub>6</sub> O <sub>20</sub> ] <sup>5-</sup> | 3.7682 | -3255.88732093 | -3255.720542 | 225.180 | -3255.827532 |
| <i>iso2</i> -[Cr(OH) <sub>4</sub> W <sub>6</sub> O <sub>20</sub> ] <sup>5-</sup> | 3.7694 | -3255.88112230 | -3255.714315 | 227.054 | -3255.822196 |
| <i>iso3</i> -[Cr(OH) <sub>4</sub> W <sub>6</sub> O <sub>20</sub> ] <sup>5-</sup> | 3.7680 | -3255.88705351 | -3255.720318 | 226.077 | -3255.827734 |
| <i>iso4</i> -[Cr(OH) <sub>4</sub> W <sub>6</sub> O <sub>20</sub> ] <sup>5-</sup> | 3.7694 | -3255.88122944 | -3255.714308 | 225.626 | -3255.821510 |
| Cr(OH) <sub>5</sub> W <sub>6</sub> O <sub>19</sub> ] <sup>4-</sup>               | 3.7678 | -3256.36282439 | -3256.183209 | 227.963 | -3256.291522 |
| Cr(OH) <sub>6</sub> W <sub>6</sub> O <sub>18</sub> ] <sup>3-</sup>               | 3.7672 | -3256.82566019 | -3256.632425 | 228.456 | -3256.740972 |
| H <sup>+</sup> , [6]                                                             | -      | -              | -0.43805     | -       | -0.42068     |

Free energies are not symmetry corrected. <sup>a</sup>S<sup>2</sup> is the square of the total spin angular momentum. *Iso<sub>n</sub>* (n=1-4) refers to the different isomer of each protonation state using the same nomenclature as in the supplemental information. <sup>b</sup>μ<sub>3</sub>-O, μ<sub>2</sub>-O and O<sub>t</sub> denote when the proton is localized on a triply-bridging oxygen (μ<sub>3</sub>-O), doubly-bridging oxygen (μ<sub>2</sub>-O) or terminal oxygen (O<sub>t</sub>) atom, respectively. Structures of all isomers for each protonated state are provided in a separate multi-xyz file.

**Table S15.** Relative enthalpies with respect to the *iso1* (two protonated μ<sub>3</sub>-O atoms from one side of the anion) isomer of [Cr(OH)<sub>2</sub>W<sub>6</sub>O<sub>22</sub>]<sup>7-</sup> (see structures of isomers in the supplemental xyz file).

| Anion                                                                            | ΔH<br>(kcal·mol <sup>-1</sup> ) |
|----------------------------------------------------------------------------------|---------------------------------|
| <i>iso1</i> -[Cr(OH) <sub>2</sub> W <sub>6</sub> O <sub>22</sub> ] <sup>7-</sup> | 0                               |
| <i>iso2</i> -[Cr(OH) <sub>2</sub> W <sub>6</sub> O <sub>22</sub> ] <sup>7-</sup> | +0.1                            |
| <i>iso3</i> -[Cr(OH) <sub>2</sub> W <sub>6</sub> O <sub>22</sub> ] <sup>7-</sup> | +3.8                            |

**Table S16.** Relative enthalpies with respect to the *iso1* (three protonated μ<sub>3</sub>-O atoms on the same side and one protonated μ<sub>3</sub>-O atom on the opposite side of the anion) isomer of [Cr(OH)<sub>4</sub>W<sub>6</sub>O<sub>20</sub>]<sup>5-</sup> (see structures of isomers in the supplemental xyz file).

| Anion                                                                            | ΔH<br>(kcal·mol <sup>-1</sup> ) |
|----------------------------------------------------------------------------------|---------------------------------|
| <i>iso1</i> -[Cr(OH) <sub>4</sub> W <sub>6</sub> O <sub>20</sub> ] <sup>5-</sup> | 0                               |
| <i>iso2</i> -[Cr(OH) <sub>4</sub> W <sub>6</sub> O <sub>20</sub> ] <sup>5-</sup> | +3.9                            |
| <i>iso3</i> -[Cr(OH) <sub>4</sub> W <sub>6</sub> O <sub>20</sub> ] <sup>5-</sup> | +0.1                            |
| <i>iso4</i> -[Cr(OH) <sub>4</sub> W <sub>6</sub> O <sub>20</sub> ] <sup>5-</sup> | +3.9                            |

## 9. Powder X-ray diffraction

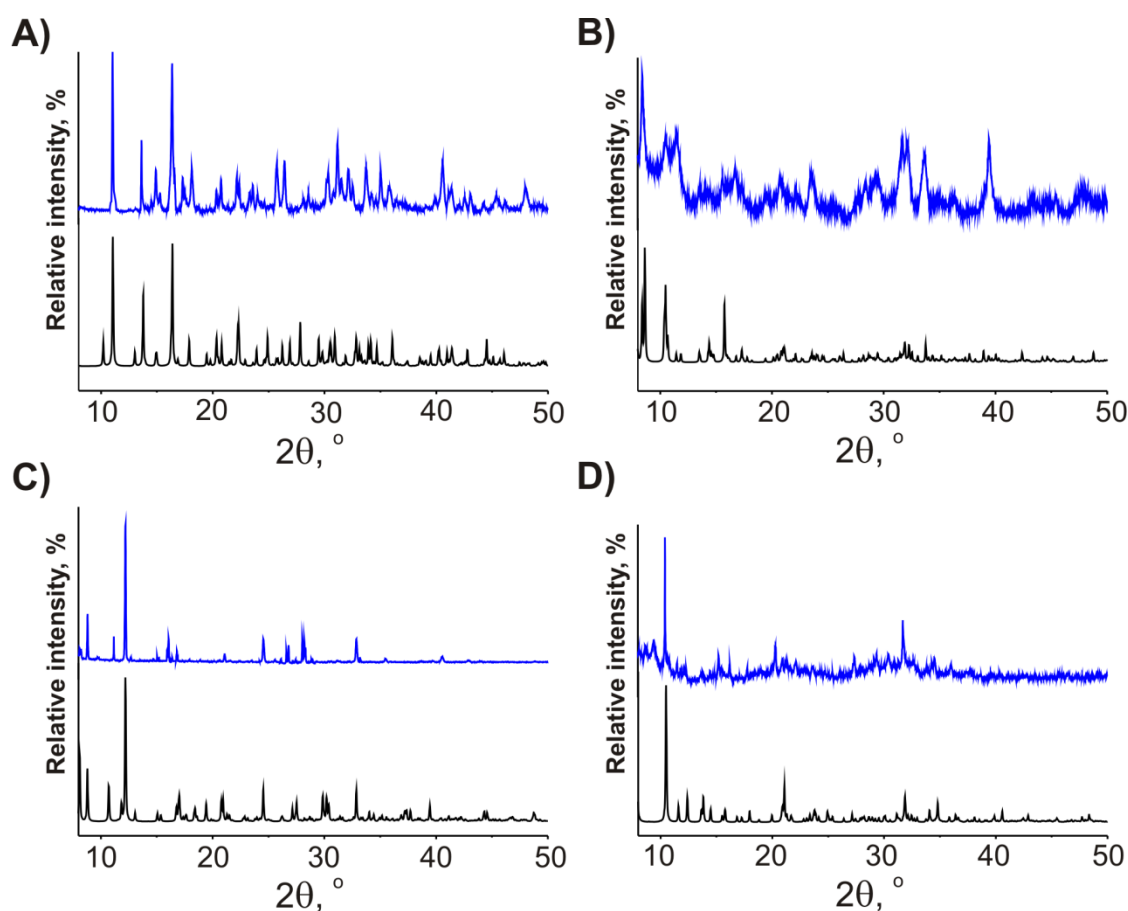

**Figure S15.** Experimental (blue) and simulated (black) X-ray diffraction patterns of A)  $\text{Na}_3\text{CrW}_6(\text{tris-C}_2\text{H}_5)_2 \cdot 13\text{H}_2\text{O}$ ; B)  $\text{Na}_3\text{K}_3\text{CrW}_6\text{-tris-C}_2\text{H}_5 \cdot 17\text{H}_2\text{O}$ ; C)  $\text{Na}_5\text{CrW}_6\text{-tris-NH}_3 \cdot 17\text{H}_2\text{O}$ ; D)  $\text{Na}_4(\text{TMA})_2\text{CrW}_6\text{-tris-CH}_2\text{OH} \cdot 19\text{H}_2\text{O}$

## References

- 1 Bruker SAINT V8.32B Copyright © 2005-2015 Bruker AXS.
- 2 Sheldrick, G. M. **1996**. SADABS. University of Göttingen, Germany.
- 3 Sheldrick, G. M. A short history of SHELX. *Acta Cryst. A*, **2008**, A64, 112-122.
- 4 Dolomanov, O. V.; Bourhis, L. J.; Gildea, R. J.; Howard, J. A. K.; Puschmann, H. OLEX2: a complete structure solution, refinement and analysis program. *J. Appl. Cryst.*, **2009**, *42*, 339-341.
- 5 Huebschle, C. B.; Sheldrick, G. M.; Dittrich, B. ShelXle: a Qt graphical user interface for SHELXL. *J. Appl. Cryst.*, **2011**, *44*, 1281-1284.
- 6 Liu, W.; Lin, Z.; Bassil, B. S.; Al-Oweini, R.; Körtz, U. Synthesis and Structure of Hexatungstochromate(III),  $[\text{H}_3\text{Cr}^{\text{III}}\text{W}_6\text{O}_{24}]^{6-}$ . *CHIMIA*, **2015**, *69*, 537-540.
- 7 Gumerova, N. I.; Roller, A.; Rompel, A.  $[\text{Ni}(\text{OH})_3\text{W}_6\text{O}_{18}(\text{OCH}_2)_3\text{CCH}_2\text{OH}]^{4-}$ : the first tris-functionalized Anderson-type heteropolytungstate. *Chem. Commun.*, **2016**, *52*, 9263-9266.
- 8 Brown, I. D.; Altermatt, D. Bond-valence parameters obtained from a systematic analysis of the Inorganic Crystal Structure Database. *Acta Cryst. B*, **1985**, *41*, 244-247.
- 9 Brese, N. E.; O'Keeffe, M. Bond-valence parameters for solids. *Acta Cryst. B*, **1991**, *47*, 192-197.
